# Supplementary material for: IFT81, encoding an IFT-B core protein, as a very rare cause of a ciliopathy phenotype
Source: HighWire-hosted journal article supplement (doi:10.1136/jmedgenet-2014-102838), 2015-08-14
Supplement: jmedgenet-2014-102838supp.pdf [file jmedgenet-2014-102838supp.pdf]

**Figure S1**

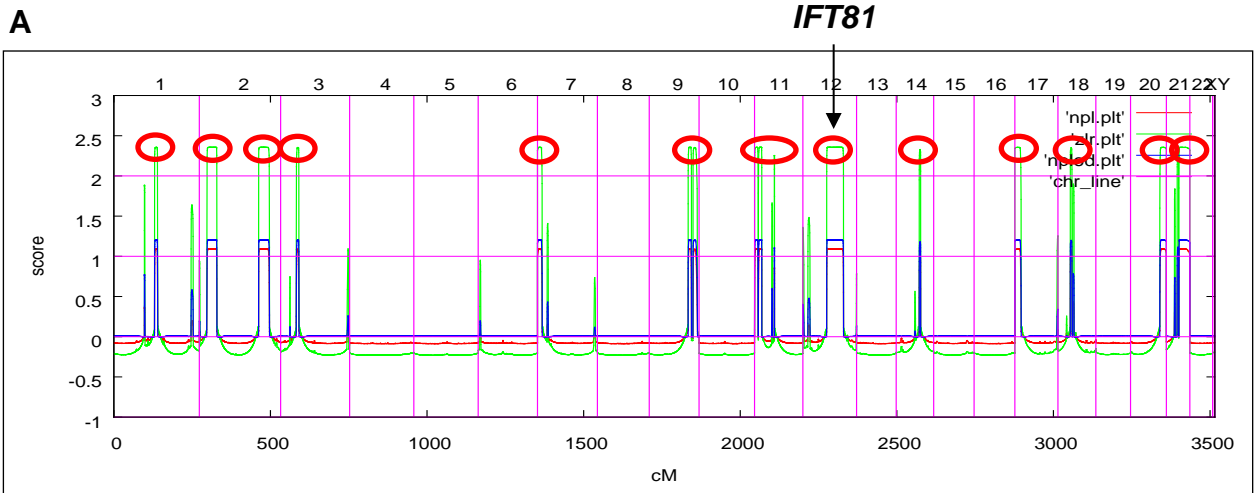

**B**

| Individual  | Gene          | hg19 pos.               | Accession #    | Nt change >        | AA change p.                          | Amino acid conservation      |       |       |    |    |    |       |       | Poly 2 | Mut Taster | SIFT        | 1000 genomes* | EVS |
|-------------|---------------|-------------------------|----------------|--------------------|---------------------------------------|------------------------------|-------|-------|----|----|----|-------|-------|--------|------------|-------------|---------------|-----|
|             |               |                         |                |                    |                                       | Mm                           | Gg    | Xt    | Dr | Ci | Ce | Dm    |       |        |            |             |               |     |
| A3286-21    | <i>IFT81</i>  | chr12:110600871         | NM_014055.3    | G>A                | 5' splice site                        | Nucleotide is 100% conserved |       |       |    |    |    |       |       |        |            |             | no            | n/a |
|             | <i>GDAP2</i>  | chr1:118420677          | NM_017686      | G>C                | P467R                                 | P                            | P     | P     | P  | -  | -  | K     | 1     | DC     | Tol        | no          | n/a           |     |
|             | <i>ADAM30</i> | chr1:120438619          | NM_021794      | C>T                | G114D                                 | G                            | G     | G     | G  | G  | G  | 0,999 | Tol   | Del    | no         | T=1/C=13005 |               |     |
|             | <i>WDR35</i>  | chr2:20137642           | NM_001006657   | C>T                | R721H                                 | R                            | R     | R     | R  | R  | K  | R     | 0,015 | DC     | Tol        | no          | T=1/C=13003   |     |
|             | <i>XDH</i>    | chr2:31565143           | NM_000379      | C>T                | S1142N                                | S                            | N     | D     | D  | D  | D  | H     | 0     | Tol    | Tol        | no          | n/a           |     |
|             | <i>LAMC3</i>  | chr9:133946985          | NM_006059      | G>A                | V1062I                                | V                            | G     | L     | A  | G  | V  | L     | 0,001 | Tol    | Tol        | no          | A=2/G=13004   |     |
|             | <i>OAS2</i>   | chr12:113448219         | NM_016817      | C>T                | P697L                                 | P                            | -     | -     | -  | -  | -  | K     | 0,622 | Tol    | Tol        | no          | n/a           |     |
| <i>DPH1</i> | chr17:1936837 | NM_001383               | C>G            | P39A               | P                                     | E                            | -     | E     | D  | E  | Q  | 0     | Tol   | Tol    | no         | n/a         |               |     |
| NCK033      | <i>IFT81</i>  | chr12:110656015         | NM_014055.3    | delACCGG           | D672Afs*                              | DRLVL                        | DRLIL | DRLVL | ?  | ?  | -  | ?     |       |        |            | no          | n/a           |     |
|             | <i>PPT1</i>   | chr1:40542579           | NM_000310.3    | G>A                | G245R                                 | G                            | G     | G     | G  | G  | G  | Q     | 1     | -      | -          | no          | n/a           |     |
|             | <i>MUTYH</i>  | chr1:45331783_45331784  | NM_012222.2    | insGGAGGCC         | V352Afs*58                            | -                            | -     | -     | -  | -  | -  | -     | -     | -      | -          | no          | n/a           |     |
|             | <i>NHS</i>    | chrX:17375984           | NM_198270.2    | C>T                | A76V                                  | A                            | -     | -     | -  | -  | -  | -     | 0,039 | -      | -          | no          | n/a           |     |
|             | <i>SEPT6</i>  | chrX:118771080          | NM_145799.3    | A>G                | Q289R                                 | Q                            | Q     | Q     | Q  | Q  | R  | Q     | 0,997 | DC     | Tol        | no          | n/a           |     |
|             | <i>CSMT1</i>  | chr16:1470712           | NM_001272051.1 | T>G                | L5V                                   | L                            | -     | T     | F  | -  | -  | -     | 0,476 | -      | Tol        | no          | n/a           |     |
|             | <i>CC154</i>  | chr16:1493840           | NM_001143980.1 | C>T                | P61S                                  | P                            | P     | P     | P  | -  | -  | -     | 0,903 | -      | Tol        | no          | n/a           |     |
|             | <i>NUAK1</i>  | chr12:106461470         | NM_014840.2    | C>T                | R366W                                 | R                            | R     | P     | -  | -  | -  | -     | 0,999 | -      | Tol        | no          | n/a           |     |
|             | <i>OTUD7A</i> | chr15:31776211_31776212 | NM_130901.1    | insGCCGCCG<br>CCGC | p.A689_Thr69<br>DlinsProProPro<br>Pro | -                            | -     | -     | -  | -  | -  | -     | -     | -      | -          | no          | n/a           |     |

**Fig. S1: Homozygosity mapping of A3286-21 and final WER-variant table for A3286-21 and NCK033. (A)** nonparametric LOD (NPL) scores from whole-genome mapping are plotted across the human genome. The x-axis shows Affymetrix 250K Styl array SNP positions on human chromosomes concatenated from pter to qter. Genetic distance is given in cM. Thirteen maximum NPL peaks (red circles) indicate candidate regions of homozygosity by descent. Note that the locus of *IFT81* resides within one of the homozygous regions on chromosome 12 (black arrow). **(B)** Final remaining variants after filtering process. *IFT81* variants are highlighted in yellow to indicate ranking as most likely disease causing. *WDR35*-missense variant in A3286-21 is highlighted in grey to indicate that nucleotide T is present in several closely related mammals (squirrel monkey, marmoset, dog, elephant) pointing towards a benign polymorphism. In NCK033, in addition to the change in *IFT81*, the *PPT1*-variant is most likely disease causing, as defects in the encoding enzyme are known to be associated with neuronal ceroid lipofuscinosis (CLN1).

Mm - Mus musculus, Gg - Gallus gallus, Xt - Xenopus tropicalis, Dr - Danio rerio, Ci - Ciona intestinalis, Ce - Caenorhabditis elegans, Dm - Drosophila melanogaster, DC - Disease causing, Tol - Tolerated, n/a - not annotated, Poly 2, Polyphen-2-Humvar; Mut Taster, Mutation Taster; EVS, Exome variant server.

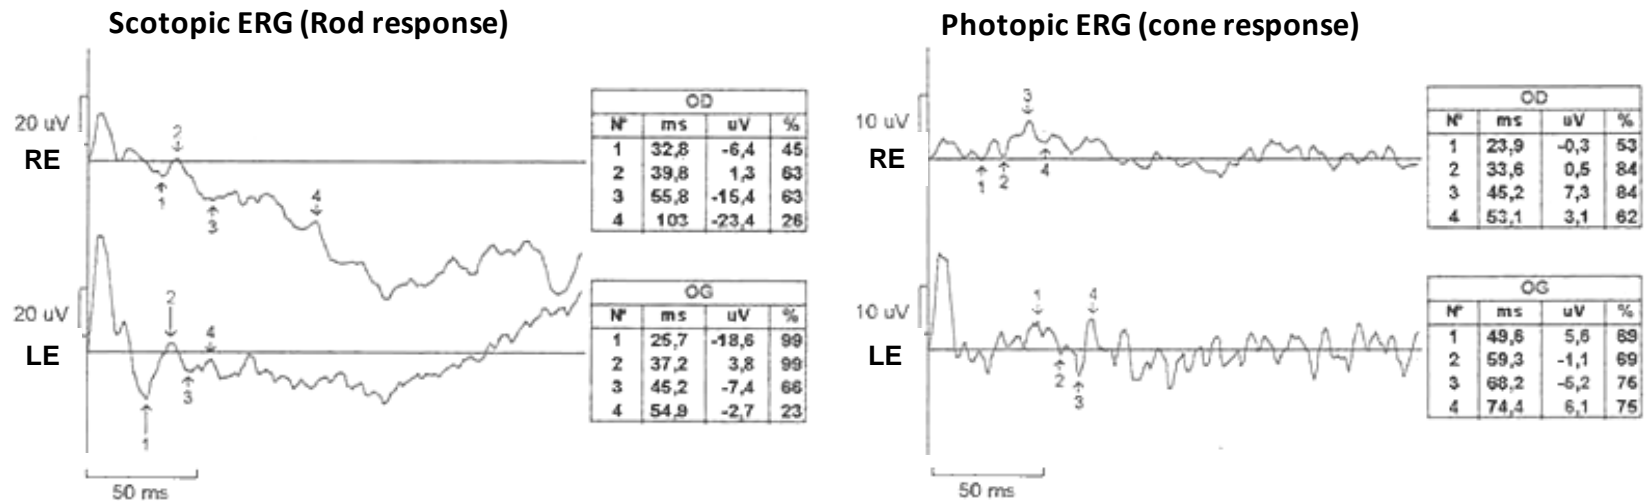

**Figure S2. Patient NCK033 scotopic and photopic ERG traces.** The morphology and culminating time of rod and cone responses are normal but the maximum response amplitudes are strikingly reduced. These traces are consistent with the diagnostic of rod-cone dystrophy. RE: right eye; LE: Left eye.

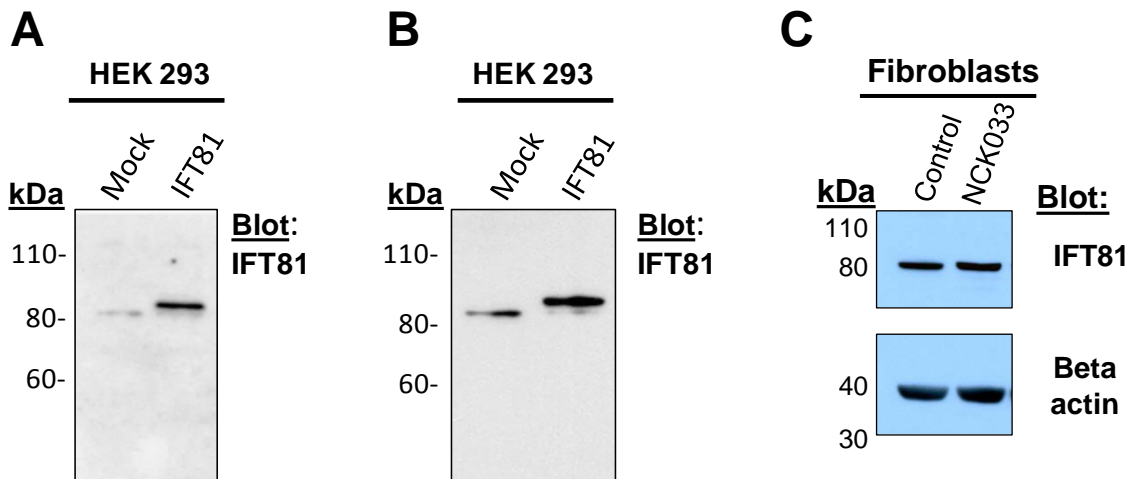

**Figure S3. AB-specificity of IFT81 and protein expression in mutant fibroblasts.**

**(A)** Overexpression of either Mock or N-terminally His/Flag tagged IFT81. Note that the N-terminal tags add 18 kDa for an expected size of 99 kDa. Overexpressed IFT81 is significantly stronger than endogenously expressed detected by the anti-IFT81 Proteintech antibody used for IF. **(B)** Overexpression of either Mock or N-terminally His/Flag tagged IFT81. Note that the N-terminal tags add 18 kDa for an expected size of 99 kDa. Overexpressed IFT81 is significantly stronger than endogenously expressed (Atlas Antibodies: HPA019087). **(C)** IFT81 is specifically detected using anti-IFT81 (Atlas Antibodies: HPA019087).

HEK293 cells transfected with Mock or N-terminally His/Flag tagged IFT81, and patient and control fibroblasts were harvested and lysed in a RIPA buffer (Sigma Aldrich) containing complete protease inhibitor cocktail (Roche, Boulogne-Billancourt, France) on ice for 30 minutes with repeated mixing. Released DNA was fragmented by 20 seconds of Ultra-turrax homogenizer (Ika-Werke, Staufen, Germany) and the lysates were centrifuged (15,000g at 4 °C for 10 minutes). Proteins (50 µg) were denatured at 90 °C for 10 minutes in 4X premixed protein sample buffer (XT sample Buffer; Bio-Rad) and separated by electrophoresis (50 V for 30 minutes followed by 140 V for 90 minutes at room temperature) on Mini protean TGX 4-15% (Bio-Rad). Proteins were transferred (Trans-BlotR Bio-Rad) to PVDF membranes (Bio-Rad). Membranes were blocked with phosphate-buffered saline (PBS) 0.5% Tween-20/5% dry milk powder and incubated overnight at 4 °C under agitation with anti-IFT81, rabbit, polyclonal (Proteintech) 1:2000 dilutions. Membranes were washed three times in PBS 0.5% Tween-20 solution and incubated for 1 hour at room temperature with HRP-conjugated donkey anti-rabbit (Amersham GE Healthcare, Courtaboeuf, France) in 1:10,000 dilutions. ECL Western Blotting Detection Reagents (Amersham GE Healthcare) was applied according to the manufacturer's instructions and the blot was exposed to Chemi Doc™ (Bio-Rad).

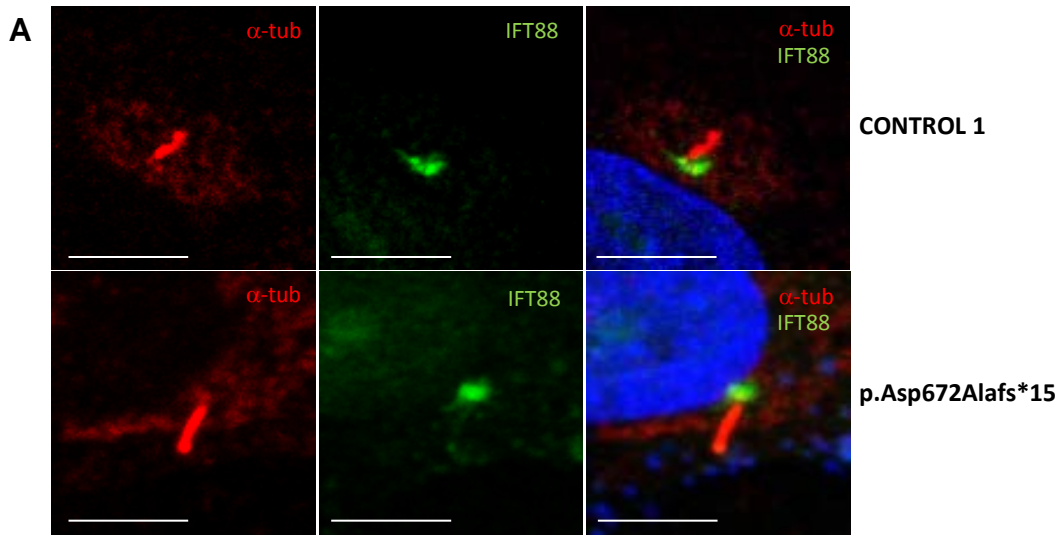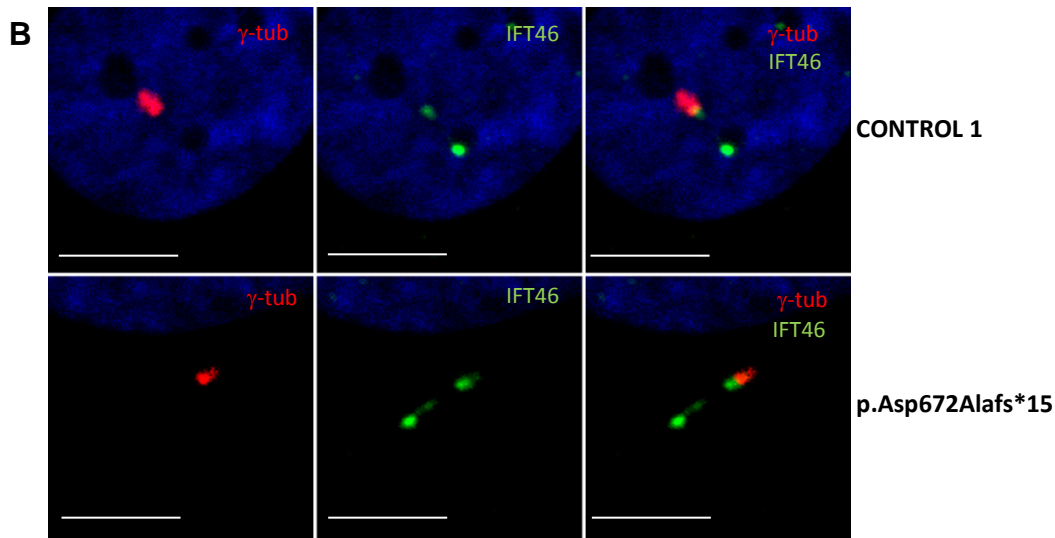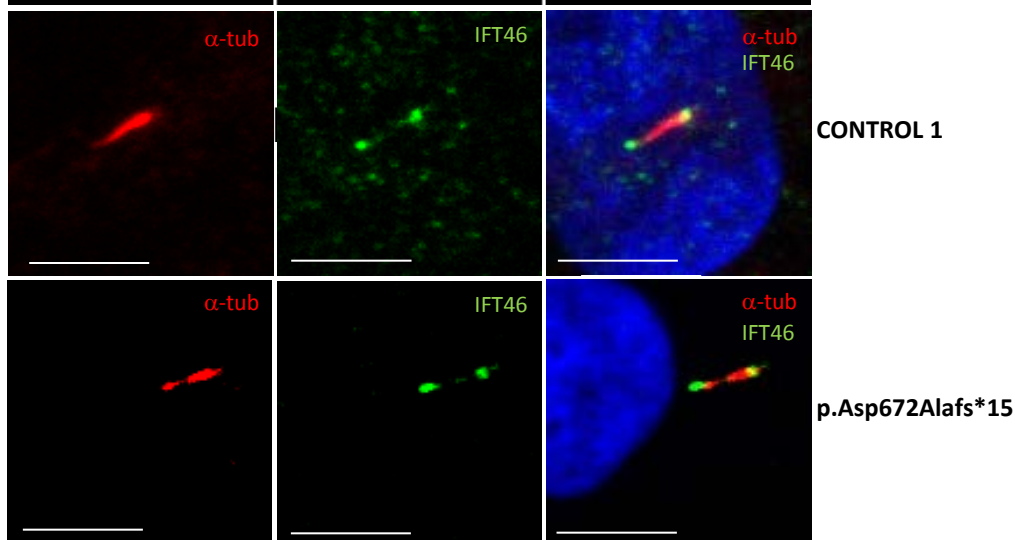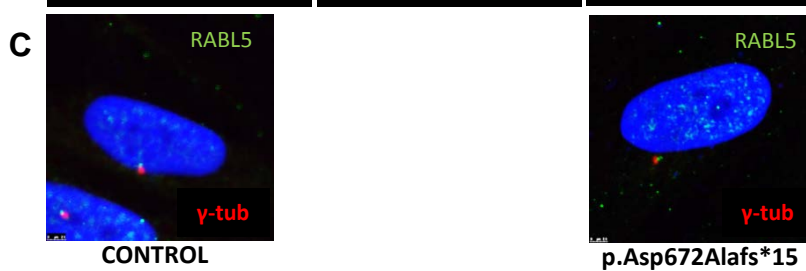

**Figure S4. Ciliary staining of three additional IFT-B core components.** Immuno-fluorescence staining was performed in cultured human fibroblasts from healthy controls and patient NCK033 (p.Asp672Alafs\*15) after 48 hours of serum starvation. Note that ciliary localization of IFT88 (A), IFT46 (B), and RABL5/IFT22 (C) did not show significant difference between control and mutant fibroblasts.

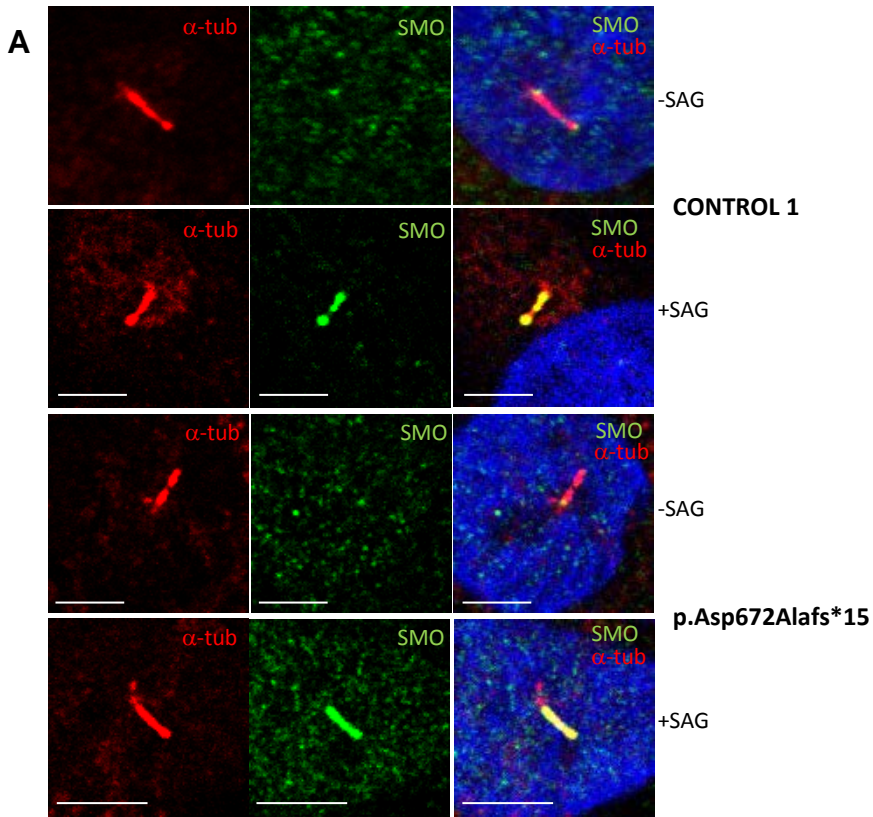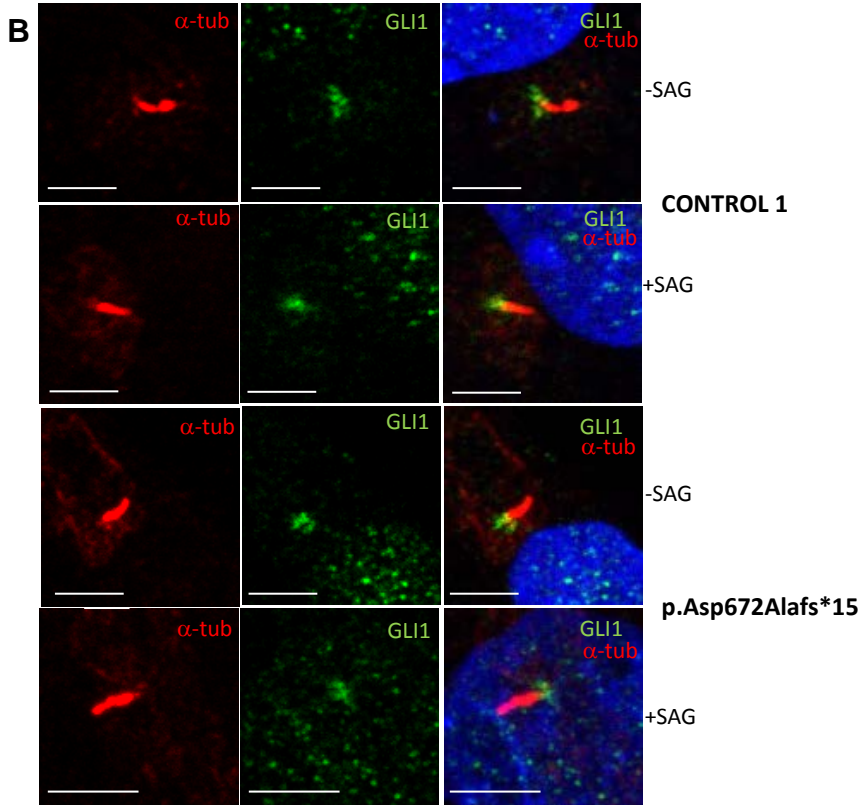

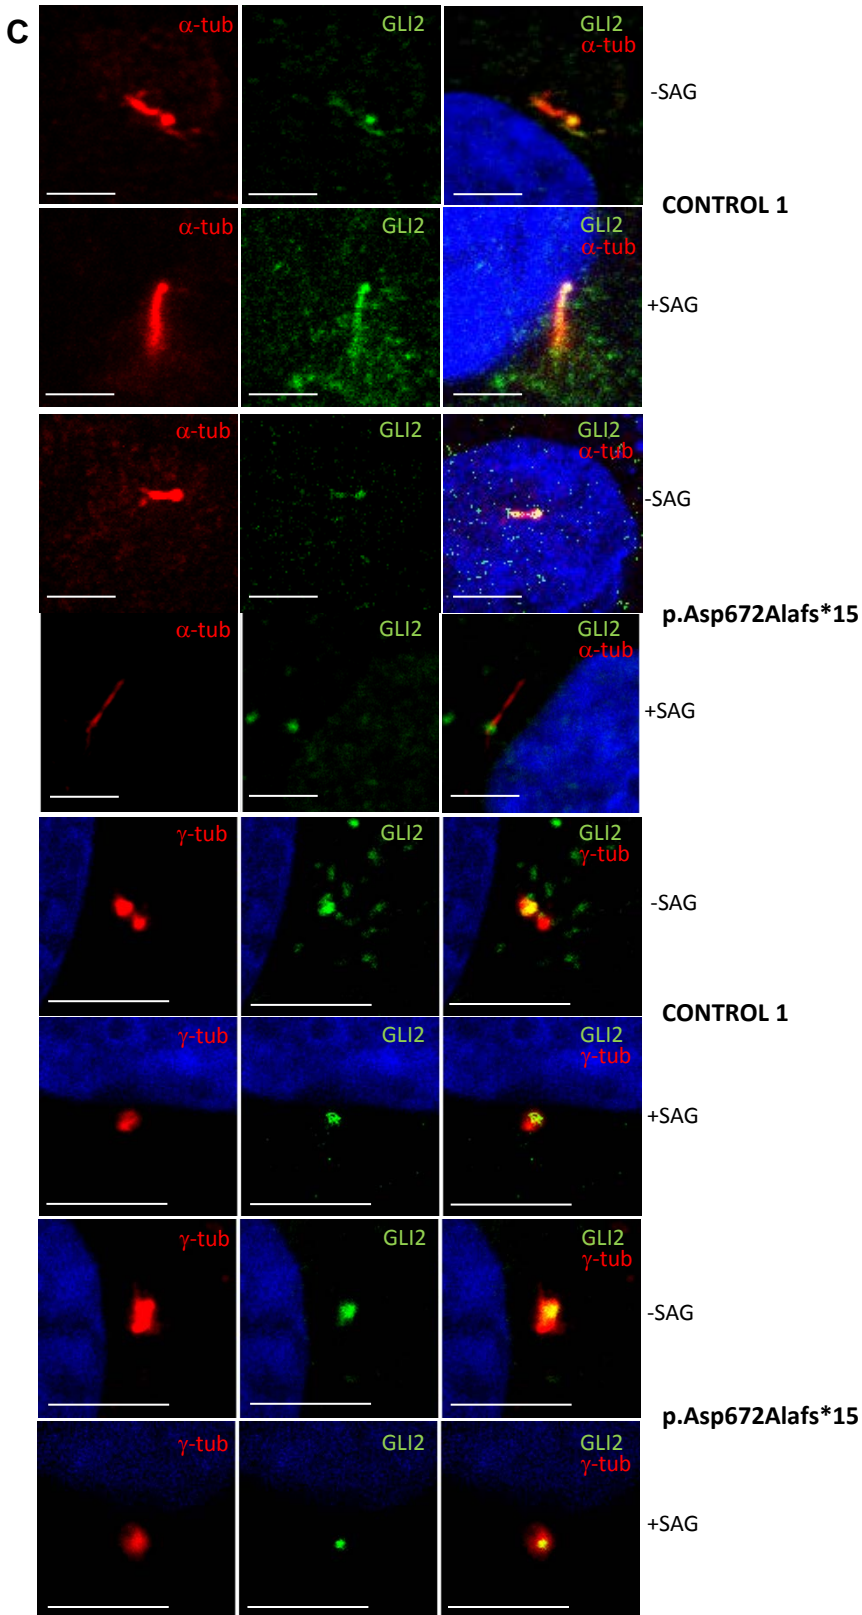

**Figure S5. Localization of Shh-pathway components in *IFT81* mutant fibroblasts (NCK033: p.Asp672Alafs\*15) compared to human control fibroblasts.** Immunofluorescence staining was performed in cultured human fibroblasts from healthy control and affected individual (p.Asp672Alafs\*15) after 48 hours of serum starvation with or without smoothed agonist for 24 hours (SAG,100nM, Santa Cruz). Cilia were stained using mouse monoclonal anti acetylated alpha tubulin, anti gamma tubulin, and either anti-SMO, anti-GLI1, or anti-GLI2 antibodies. **(A)** Immunostaining show that SMO is evenly distributed under SAG activation both in the control and affected individual cells. **(B)** Immunostaining demonstrate unchanged localization of GLI1 with and without SAG in both cell lines. **(C)** Immunostaining evidence no ciliary localization change of GLI2 in the affected individual compared to the control cells. Scale bar represents 2mm.

**Table S1.** Fourteen genes, encoding IFT-B components, included in mutation analysis in 1,056 individuals with NPHP-RC at University of Michigan / Boston Children's Hospital. B-Core proteins are highlighted in grey.

| No | <i>Gene symbol</i>           | Gene name                                                 | Accession      | Locus                         | # Exons |
|----|------------------------------|-----------------------------------------------------------|----------------|-------------------------------|---------|
| 1  | <b><i>IFT172/SLB</i></b>     | intraflagellar transport 172 homolog<br>(Chlamydomonas)   | NM_015662.1    | chr2:27,667,241-27,712,571    | 48      |
| 2  | <b><i>IFT88</i></b>          | intraflagellar transport 88 homolog<br>(Chlamydomonas)    | NM_175605.3    | chr13:21,141,208-21,265,576   | 26      |
| 3  | <b><i>IFT80</i></b>          | intraflagellar transport 80 homolog<br>(Chlamydomonas)    | NM_020800.2    | chr3:159,976,255-160,102,434  | 19      |
| 4  | <b><i>IFT46</i></b>          | intraflagellar transport 46 homolog<br>(Chlamydomonas)    | NM_020153.3    | chr11:118,415,243-118,436,791 | 11      |
| 5  | <b><i>IFT52</i></b>          | intraflagellar transport 52 homolog<br>(Chlamydomonas)    | NM_016004.2    | chr20:42,219,579-42,275,861   | 14      |
| 6  | <b><i>IFT57/HIPPI</i></b>    | intraflagellar transport 57 homolog<br>(Chlamydomonas)    | NM_018010.3    | chr3:107,879,659-107,941,417  | 11      |
| 7  | <b><i>IFT74/CCDC2</i></b>    | intraflagellar transport 74 homolog<br>(Chlamydomonas)    | NM_001099222.1 | chr9:26,956,371-27,062,931    | 19      |
| 8  | <b><i>IFT81/CDV1</i></b>     | intraflagellar transport 81 homolog<br>(Chlamydomonas)    | NM_001143779.1 | chr12:110,562,140-110,656,600 | 18      |
| 9  | <b><i>RABL5/IFT22</i></b>    | RAB, member RAS oncogene family-like 5                    | NM_022777.2    | chr7:100,956,648-100,965,093  | 5       |
| 10 | <b><i>TRAF3IP1/IFT54</i></b> | TNF receptor-associated factor 3 interacting<br>protein 1 | NM_015650.3    | chr2:239,229,185-239,309,541  | 17      |
| 11 | <b><i>HSPB11/IFT25</i></b>   | heat shock protein family B (small), member<br>11         | NM_016126.2    | chr1:54,387,234-54,411,288    | 4       |
| 12 | <b><i>IFT20</i></b>          | intraflagellar transport 20 homolog                       | NM_174887.2    | chr17:26,655,353-26,662,495   | 5       |
| 13 | <b><i>IFT27</i></b>          | intraflagellar transport 27 homolog                       | NM_001177701.2 | chr22:37,154,246-37,172,172   | 7       |
| 14 | <b><i>TTC30B/IFT70</i></b>   | tetratricopeptide repeat domain 30B                       | NM_152517.2    | chr2:178,414,886-178,417,524  | 1       |

**Table S2.** *GLI1*, *GLI2*, *SMO*, and *PTCH1* specific primers sequences for qRT-PCR.

| <b>GENE</b>         | <b>PRIMER SEQUENCE</b>                            | <b>ACCESSION #</b> | <b>LENGTH</b> |
|---------------------|---------------------------------------------------|--------------------|---------------|
| <b><i>PTCH1</i></b> | F : GCTACTTACTCATGCTCGCC R : TCCGATCAATGAGCACAGGC | NM_001083605       | 140           |
| <b><i>SMO</i></b>   | F : GGGAGGCTACTTCCTCATCC R : TGGTCTCGTTGATCTTGCTG | NM_005631          | 103           |
| <b><i>GLI1</i></b>  | F : AGAGGGTGCCATGAAGCCAC R: AAGGTCCCTCGTCCAAGCTG  | NM_005269.2        | 161           |
| <b><i>GLI2</i></b>  | F : TGACACCAACCAGAACAAGC R : GTCCAGACACCTGGCCCTG  | NM_005270          | 156           |
